# Supplementary material for: Gene Transcription Changes in Asthmatic Chronic Rhinosinusitis with Nasal Polyps and Comparison to Those in Atopic Dermatitis
Source: PLoS One. 2010 Jul 6;5(7):e11450. doi: 10.1371/journal.pone.0011450 (PMC2897889; doi:10.1371/journal.pone.0011450)
Supplement: Table S2 — Differentially Transcribed Genes in Asthmatic Chronic Rhinosinusitis with Nasal Polyposis. (0.13 MB XLS) [file pone.0011450.s002.xls]

## Sheet: aCRSwNP(n20) vs N+AR(n17)_core
Supplemental Table 2: Differentially Transcribed Genes in Asthmatic Chronic Rhinosinusitis with Nasal Polyposis.
Douglas A. Plager, Ph.D., Mayo Clinic, Guggenheim 4-94, 200 First Street Southwest, Rochester, Minnesota 55905, Tel: 507-284-9931, e-mail: plager.douglas@mayo.edu.
Affymetrix Transcript Cluster ID	log(2)(mean signal intensity,aCRSwNP)	StDev-log(2) aCRSwNP	log(2)(mean signal intensity,N+AR)	StDev-log(2) N+AR	p value(unpaired nonparametric test with Benjamini-Hochberg False Discovery Rate adjustment)	Mean Ratio (aCRSwNP/N+AR)	Fold Change (aCRSwNP/N+AR)	gene_assignment
3718902	9.39167	1.73929	3.13556	1.01902	5.42592e-15	76.4323	76.4323	NM_002988 // CCL18 // chemokine (C-C motif) ligand 18 (pulmonary and activation-regulated) // 17q11.2 // 6362
3862108	7.29425	1.70892	2.26305	0.576749	1.63243e-13	32.6994	32.6994	NM_001828 // CLC // Charcot-Leyden crystal protein // 19q13.1 // 1178
3901361	9.81075	1.74946	4.83164	1.2852	1.82377e-11	31.5399	31.5399	NM_001898 // CST1 // cystatin SN // 20p11.21 // 1469 ///
3718204	7.58824	1.29833	3.77966	0.729013	1.30423e-12	14.0119	14.0119	NM_005408 // CCL13 // chemokine (C-C motif) ligand 13 // 17q11.2 // 6357 ///
2497082	6.59993	1.18942	3.45853	0.656981	1.908e-11	8.82384	8.82384	NM_016232 // IL1RL1 // interleukin 1 receptor-like 1 // 2q12 // 9173 ///
3901387	7.25162	0.994611	4.18986	1.15713	3.19125e-10	8.3499	8.3499	NM_001322 // CST2 // cystatin SA // 20p11.21 // 1470
3510066	9.42971	0.588674	6.44965	0.944615	1.19223e-13	7.89018	7.89018	NM_006475 // POSTN // periostin, osteoblast specific factor // 13q13.3 // 10631
3818596	5.75759	1.32673	2.81421	0.280115	1.37906e-10	7.69211	7.69211	NM_001974 // EMR1 // egf-like module containing, mucin-like, hormone receptor-like 1 // 19p13.3 // 2015 ///
3852832	5.83885	1.13056	3.06761	0.24407	1.12336e-11	6.82694	6.82694	NM_032571 // EMR3 // egf-like module containing, mucin-like, hormone receptor-like 3 // 19p13.1 // 84658 ///
2940202	9.16663	0.821681	6.40563	0.667728	5.38486e-13	6.77868	6.77868	NM_000129 // F13A1 // coagulation factor XIII, A1 polypeptide // 6p25.3-p24.3 // 2162
2735027	6.23057	1.24581	3.58733	0.820239	9.50992e-09	6.24733	6.24733	NM_000582 // SPP1 // secreted phosphoprotein 1 (osteopontin, bone sialoprotein I, early T-lymphocyte activation 1) // 4q21-q25 // 6696 ///
2810764	5.72224	1.03866	3.08566	0.477216	2.29168e-11	6.21856	6.21856	NM_152687 // C5orf29 // chromosome 5 open reading frame 29 // 5q11.2 // 202309 ///
2447414	7.28521	0.912944	4.71592	0.485932	2.9767e-12	5.93517	5.93517	XM_931261 // WHDC1L1 // WAS protein homology region 2 domain containing 1-like 1 // 15q11.2 // 339005 ///
3870449	5.11722	1.18336	2.62307	0.312946	6.10196e-10	5.63395	5.63395	NM_198481 // VSTM1 // V-set and transmembrane domain containing 1 // 19q13.42 // 284415 ///
3891664	6.91861	0.898953	4.452	0.528172	1.00055e-11	5.52742	5.52742	NM_021810 // CDH26 // cadherin-like 26 // 20q13.2-q13.33 // 60437 ///
3484060	8.45109	0.888406	5.99268	0.504883	6.61918e-12	5.49608	5.49608	NM_001629 // ALOX5AP // arachidonate 5-lipoxygenase-activating protein // 13q12 // 241
2377332	5.7034	0.853411	3.24927	0.415613	1.08485e-12	5.47981	5.47981	XM_936504 // LOC653908 // similar to complement component (3b/4b) receptor 1 isoform F precursor // // 653908 ///
3782195	4.11217	1.36185	1.67718	0.219229	1.68138e-08	5.40762	5.40762	NM_021624 // HRH4 // histamine receptor H4 // 18q11.2 // 59340
3595594	4.55258	1.01782	2.19555	0.624116	8.65335e-10	5.12315	5.12315	NM_020980 // AQP9 // aquaporin 9 // 15q22.1-22.2 // 366
3275729	6.23587	0.833207	3.98904	0.619997	7.94596e-11	4.74638	4.74638	NM_000417 // IL2RA // interleukin 2 receptor, alpha // 10p15-p14 // 3559
3750369	6.65627	1.01629	4.4188	0.913196	3.95211e-08	4.71569	4.71569	NM_153292 // NOS2A // nitric oxide synthase 2A (inducible, hepatocytes) // 17q11.2-q12 // 4843 ///
3830484	4.49129	1.29293	2.27759	0.475596	1.00976e-07	4.63862	4.63862	NM_005306 // FFAR2 // free fatty acid receptor 2 // 19q13.1 // 2867
3362826	6.37476	1.20234	4.16209	0.702138	1.01168e-07	4.63533	4.63533	NM_006691 // XLKD1 // extracellular link domain containing 1 // 11p15 // 10894 ///
2435989	7.62528	0.900212	5.42223	1.66945	1.18211e-05	4.6045	4.6045	NM_002964 // S100A8 // S100 calcium binding protein A8 (calgranulin A) // 1q21 // 6279
3662851	6.09415	1.00647	3.9118	0.244911	2.78798e-10	4.53891	4.53891	NM_170776 // GPR97 // G protein-coupled receptor 97 // 16q13 // 222487 ///
3656990	5.88049	0.99754	3.73009	0.297398	4.26034e-10	4.43954	4.43954	NM_000632 // ITGAM // integrin, alpha M (complement component 3 receptor 3 subunit) // 16p11.2 // 3684 ///
3848540	6.40513	0.898643	4.25741	0.381774	7.96631e-11	4.43124	4.43124	NM_021155 // CD209 // CD209 molecule // 19p13 // 30835 ///
3718185	5.53927	1.27208	3.42947	0.734546	7.05981e-07	4.31631	4.31631	NM_002986 // CCL11 // chemokine (C-C motif) ligand 11 // 17q21.1-q21.2 // 6356 ///
2647109	7.54267	0.906521	5.46513	0.735408	7.27152e-09	4.22086	4.22086	NM_001870 // CPA3 // carboxypeptidase A3 (mast cell) // 3q21-q25 // 1359
2642261	3.77902	1.13434	1.72196	0.23593	1.44548e-08	4.16138	4.16138	NM_153264 // FLJ35880 // hypothetical protein FLJ35880 // 3q22.1 // 256076 ///
3742212	9.88216	0.661018	7.83042	0.987391	8.0992e-09	4.14606	4.14606	NM_001140 // ALOX15 // arachidonate 15-lipoxygenase // 17p13.3 // 246
2362201	5.89848	0.750507	3.84929	0.497288	2.44916e-11	4.13875	4.13875	NM_001763 // CD1A // CD1a molecule // 1q22-q23 // 909 ///
3718191	5.00378	1.11055	2.96351	0.908172	6.7226e-07	4.11323	4.11323	NM_005623 // CCL8 // chemokine (C-C motif) ligand 8 // 17q11.2 // 6355
2648098	3.38173	1.16517	1.34501	0.326388	4.23481e-08	4.10312	4.10312	NM_033050 // SUCNR1 // succinate receptor 1 // 3q24-3q25.1 // 56670
2739468	5.07878	0.63749	3.09173	0.542475	6.40263e-12	3.96427	3.96427	NM_001977 // ENPEP // glutamyl aminopeptidase (aminopeptidase A) // 4q25 // 2028 ///
3442941	6.46937	0.997867	4.48965	0.644518	3.5808e-08	3.94416	3.94416	NM_004054 // C3AR1 // complement component 3a receptor 1 // 12p13.31 // 719
3527722	3.33276	1.36892	1.35402	0.489185	2.2274e-06	3.94149	3.94149	NM_002934 // RNASE2 // ribonuclease, RNase A family, 2 (liver, eosinophil-derived neurotoxin) // 14q24-q31 // 6036
3635198	4.5462	0.968702	2.584	0.523416	9.65011e-09	3.89656	3.89656	NM_004049 // BCL2A1 // BCL2-related protein A1 // 15q24.3 // 597 ///
2620813	3.8879	0.932451	1.94441	0.173747	5.67712e-10	3.84634	3.84634	NM_178329 // CCR3 // chemokine (C-C motif) receptor 3 // 3p21.3 // 1232 ///
3057505	4.46644	0.919184	2.52542	0.328697	9.92828e-10	3.83976	3.83976	NM_006072 // CCL26 // chemokine (C-C motif) ligand 26 // 7q11.23 // 10344
3057514	5.15687	1.00674	3.22097	0.397735	1.04944e-08	3.82616	3.82616	NM_002991 // CCL24 // chemokine (C-C motif) ligand 24 // 7q11.23 // 6369
3333877	5.37258	0.973904	3.43779	0.28377	2.76997e-09	3.82323	3.82323	NM_033101 // LGALS12 // lectin, galactoside-binding, soluble, 12 (galectin 12) // 11q13 // 85329 ///
2860178	5.33098	0.899313	3.39696	0.527946	3.76864e-09	3.82117	3.82117	NM_005582 // CD180 // CD180 molecule // 5q12 // 4064
3442706	6.77288	0.987195	4.87244	0.628362	6.16713e-08	3.73328	3.73328	NM_004244 // CD163 // CD163 molecule // 12p13.3 // 9332 ///
3393670	7.33402	0.85145	5.43715	0.407477	6.73022e-10	3.72406	3.72406	NM_153206 // AMICA1 // adhesion molecule, interacts with CXADR antigen 1 // 11q23.3 // 120425 ///
2403446	6.66812	0.742331	4.7746	0.382638	3.3032e-11	3.71539	3.71539	NM_000952 // PTAFR // platelet-activating factor receptor // 1p35-p34.3 // 5724 ///
3869237	5.69536	0.737813	3.84377	0.506645	2.57393e-10	3.60897	3.60897	NM_002029 // FPR1 // formyl peptide receptor 1 // 19q13.4 // 2357 ///
3089816	5.99387	0.584348	4.18081	0.479848	5.10316e-12	3.51387	3.51387	NM_003841 // TNFRSF10C // tumor necrosis factor receptor superfamily, member 10c, decoy without an intracellular domain // 8p22-p21 // 8794 ///
2672096	5.26185	1.01254	3.45374	0.469002	7.77761e-08	3.50183	3.50183	NM_001295 // CCR1 // chemokine (C-C motif) receptor 1 // 3p21 // 1230
2955827	5.18795	0.830175	3.39257	0.706452	3.67722e-08	3.47107	3.47107	NM_005084 // PLA2G7 // phospholipase A2, group VII (platelet-activating factor acetylhydrolase, plasma) // 6p21.2-p12 // 7941 ///
2326463	7.20509	0.685011	5.41357	0.7011	3.22731e-09	3.46179	3.46179	NM_001803 // CD52 // CD52 molecule // 1p36 // 1043
2443450	6.6513	0.774076	4.88955	0.473183	1.27615e-09	3.39108	3.39108	NM_000450 // SELE // selectin E (endothelial adhesion molecule 1) // 1q22-q25 // 6401 ///
2351854	7.44206	0.626902	5.68328	0.496076	4.90595e-11	3.38413	3.38413	NM_174896 // C1orf162 // chromosome 1 open reading frame 162 // 1p13.2 // 128346
2363689	6.69621	0.720887	4.94337	0.53233	9.20534e-10	3.37021	3.37021	NM_021642 // FCGR2A // Fc fragment of IgG, low affinity IIa, receptor (CD32) // 1q23 // 2212 ///
3489138	4.24372	0.817256	2.49186	0.220413	4.18646e-10	3.36794	3.36794	NM_020377 // CYSLTR2 // cysteinyl leukotriene receptor 2 // 13q14.12-q21.1 // 57105 ///
3733238	4.74133	1.29307	2.99734	0.456005	6.88374e-06	3.34961	3.34961	NM_170742 // KCNJ16 // potassium inwardly-rectifying channel, subfamily J, member 16 // 17q23.1-q24.2 // 3773 ///
2778273	5.5028	0.739402	3.77377	0.477607	9.3463e-10	3.31505	3.31505	NM_014485 // PGDS // prostaglandin D2 synthase, hematopoietic // 4q22.3 // 27306 ///
3443868	7.04849	0.982114	5.32025	1.00215	6.77389e-06	3.31323	3.31323	NM_001781 // CD69 // CD69 molecule // 12p13-p12 // 969
3388785	6.8106	1.24657	5.1344	1.24473	0.000248354	3.19584	3.19584	NM_002425 // MMP10 // matrix metallopeptidase 10 (stromelysin 2) // 11q22.3 // 4319
3332298	4.89456	1.21817	3.2234	0.778474	2.38308e-05	3.1847	3.1847	NM_024021 // MS4A4A // membrane-spanning 4-domains, subfamily A, member 4 // 11q12 // 51338 ///
3925473	4.91568	0.667565	3.27542	0.675417	1.14419e-08	3.11722	3.11722	NM_022136 // SAMSN1 // SAM domain, SH3 domain and nuclear localisation signals, 1 // 21q11 // 64092 ///
3154263	6.13004	0.498283	4.50334	0.483526	7.81982e-12	3.08805	3.08805	NM_006748 // SLA // Src-like-adaptor // 8q22.3-qter|8q24 // 6503 ///
3876084	6.085	0.609875	4.46286	0.606861	1.62965e-09	3.07831	3.07831	NM_012261 // C20orf103 // chromosome 20 open reading frame 103 // 20p12 // 24141
2888879	6.5397	0.821984	4.92296	0.653776	1.5274e-07	3.06681	3.06681	NM_024872 // DOK3 // docking protein 3 // 5q35.3 // 79930 ///
2486811	6.47766	0.83352	4.87252	0.452782	2.91754e-08	3.04225	3.04225	NM_002664 // PLEK // pleckstrin // 2p14 // 5341 ///
4015709	5.56931	0.75096	3.96446	0.426145	3.67223e-09	3.04165	3.04165	NM_000061 // BTK // Bruton agammaglobulinemia tyrosine kinase // Xq21.33-q22 // 695 ///
2372719	4.5189	0.520681	2.92053	0.349602	1.22718e-12	3.02801	3.02801	NM_130782 // RGS18 // regulator of G-protein signalling 18 // 1q31.2 // 64407
2440258	5.15212	0.686664	3.56161	0.579871	7.94975e-09	3.01156	3.01156	NM_052931 // SLAMF6 // SLAM family member 6 // 1q23.2 // 114836
3147971	3.97195	1.15603	2.3883	0.823221	3.74765e-05	2.99728	2.99728	---
3635159	5.46699	1.06952	3.88424	0.546968	3.39991e-06	2.9954	2.9954	AF249277 // MTHFS // 5,10-methenyltetrahydrofolate synthetase (5-formyltetrahydrofolate cyclo-ligase) // 15q25.1 // 10588 ///
3186491	5.58323	0.618177	4.00708	0.310705	2.97647e-11	2.98172	2.98172	NM_002581 // PAPPA // pregnancy-associated plasma protein A, pappalysin 1 // 9q33.2 // 5069 ///
3404530	4.04847	1.02699	2.48635	0.500099	1.84183e-06	2.95287	2.95287	NM_201623 // CLEC12A // C-type lectin domain family 12, member A // 12p13.2 // 160364 ///
3250146	9.14265	0.462566	7.59424	0.772629	8.12555e-09	2.92494	2.92494	NM_002727 // PRG1 // proteoglycan 1, secretory granule // 10q22.1 // 5552 ///
3147926	4.52059	0.920684	2.97486	0.676817	1.77183e-06	2.91953	2.91953	NM_001385 // DPYS // dihydropyrimidinase // 8q22 // 1807 ///
2656627	3.77282	1.03098	2.22721	0.235473	6.90478e-07	2.91928	2.91928	NM_014375 // FETUB // fetuin B // 3q27 // 26998
4013460	6.31987	0.567791	4.77968	0.626413	3.23099e-09	2.90833	2.90833	NM_006639 // CYSLTR1 // cysteinyl leukotriene receptor 1 // Xq13.2-21.1 // 10800 ///
2345023	3.23818	1.86414	1.70086	0.217577	0.00182463	2.90256	2.90256	NM_001285 // CLCA1 // chloride channel, calcium activated, family member 1 // 1p31-p22 // 1179 ///
2527580	4.36525	0.409299	2.83034	0.297036	8.36572e-15	2.89772	2.89772	NM_001557 // IL8RB // interleukin 8 receptor, beta // 2q35 // 3579 ///
3116839	5.67004	0.506557	4.14432	0.34481	2.26998e-12	2.8793	2.8793	NM_003882 // WISP1 // WNT1 inducible signaling pathway protein 1 // 8q24.1-q24.3 // 8840 ///
2404158	9.18415	0.591651	7.65915	0.732624	3.75343e-08	2.87787	2.87787	NM_006762 // LAPTM5 // lysosomal associated multispanning membrane protein 5 // 1p34 // 7805 ///
2766289	4.98075	0.816399	3.45949	0.656853	4.64727e-07	2.87042	2.87042	NM_024943 // TMEM156 // transmembrane protein 156 // 4p14 // 80008 ///
2497161	5.00793	0.815971	3.49191	0.461522	7.25799e-08	2.86002	2.86002	NM_003853 // IL18RAP // interleukin 18 receptor accessory protein // 2p24.3-p24.1 // 8807 ///
3742627	6.00836	0.688546	4.50037	0.652111	6.90942e-08	2.84414	2.84414	NM_207103 // UNQ5783 // DTFT5783 // 17p13.2 // 388325 ///
7385547	6.6642	1.07489	5.16086	1.21588	0.000319275	2.83499	2.83499	NM_002982 // CCL2 // chemokine (C-C motif) ligand 2 // 17q11.2-q12 // 6347 ///
3547375	5.11183	0.823896	3.60916	0.69354	9.30538e-07	2.83367	2.83367	NM_003608 // GPR65 // G protein-coupled receptor 65 // 14q31-q32.1 // 8477
3657041	5.97833	0.609415	4.4785	0.407397	3.44276e-10	2.82809	2.82809	XM_942448 // LOC652789 // similar to integrin alpha X precursor // // 652789 ///
2440295	5.64685	0.647488	4.14894	0.33366	3.70754e-10	2.82433	2.82433	NM_003874 // CD84 // CD84 molecule // 1q24 // 8832 ///
2781736	5.57214	0.554872	4.08506	0.499155	4.92299e-10	2.8032	2.8032	NM_000204 // CFI // complement factor I // 4q25 // 3426 ///
2953570	4.52317	1.18097	3.04085	0.515996	2.99164e-05	2.79397	2.79397	NM_018643 // TREM1 // triggering receptor expressed on myeloid cells 1 // 6p21.1 // 54210 ///
3018605	5.2983	1.40176	3.81856	1.22624	0.00176	2.78898	2.78898	NM_000441 // SLC26A4 // solute carrier family 26, member 4 // 7q31 // 5172
3470523	6.16528	0.597895	4.71148	0.526625	3.87046e-09	2.73929	2.73929	NM_003006 // SELPLG // selectin P ligand // 12q24 // 6404 ///
3770290	4.2536	0.769397	2.80593	0.318065	1.88838e-08	2.72768	2.72768	NM_174892 // CD300LB // CD300 molecule-like family member b // 17q25.1 // 124599
2601230	4.43657	0.579712	2.99682	0.435933	6.40098e-10	2.71274	2.71274	NM_003469 // SCG2 // secretogranin II (chromogranin C) // 2q35-q36 // 7857
3244622	6.32361	0.595285	4.88475	0.300726	1.16519e-10	2.71108	2.71108	XM_940853 // LOC651648 // similar to Arachidonate 5-lipoxygenase (5-lipoxygenase) (5-LO) // // 651648 ///
3973839	8.23509	0.762672	6.80719	0.634718	5.33781e-07	2.69054	2.69054	NM_000397 // CYBB // cytochrome b-245, beta polypeptide (chronic granulomatous disease) // Xp21.1 // 1536
3743306	4.56353	0.837283	3.13641	0.348531	1.462e-07	2.68909	2.68909	NM_006344 // CLEC10A // C-type lectin domain family 10, member A // 17p13.1 // 10462 ///
2886595	6.49328	0.674341	5.06894	0.42505	8.19293e-09	2.68392	2.68392	NM_005565 // LCP2 // lymphocyte cytosolic protein 2 (SH2 domain containing leukocyte protein of 76kDa) // 5q33.1-qter // 3937
2899102	5.85947	0.732928	4.45083	1.19922	0.000101653	2.65487	2.65487	NM_003531 // HIST1H3C // histone 1, H3c // 6p21.3 // 8352
3881651	6.32977	0.558713	4.92251	0.390646	2.67197e-10	2.65233	2.65233	NM_002110 // HCK // hemopoietic cell kinase // 20q11-q12 // 3055 ///
2809793	5.34109	0.764979	3.94129	0.791539	3.98541e-06	2.63865	2.63865	NM_002104 // GZMK // granzyme K (granzyme 3; tryptase II) // 5q11-q12 // 3003
3619326	6.18573	0.682435	4.78663	0.298374	3.36882e-09	2.63737	2.63737	NM_004573 // PLCB2 // phospholipase C, beta 2 // 15q15 // 5330 ///
3188111	5.39361	0.472538	4.00084	0.313829	3.37604e-12	2.62583	2.62583	NM_000962 // PTGS1 // prostaglandin-endoperoxide synthase 1 (prostaglandin G/H synthase and cyclooxygenase) // 9q32-q33.3 // 5742 ///
3385769	7.65509	0.578459	6.27905	0.309774	2.2503e-10	2.59555	2.59555	NM_148170 // CTSC // cathepsin C // 11q14.1-q14.3 // 1075 ///
3860137	7.43319	0.701222	6.061	0.538509	1.33579e-07	2.58863	2.58863	NM_198125 // TYROBP // TYRO protein tyrosine kinase binding protein // 19q13.1 // 7305 ///
3753985	3.37877	0.957784	2.00773	0.272198	1.92602e-06	2.58657	2.58657	NM_145898 // CCL23 // chemokine (C-C motif) ligand 23 // 17q12 // 6368 ///
2616131	4.32355	0.841594	2.95425	0.651024	3.99663e-06	2.58345	2.58345	NM_005508 // CCR4 // chemokine (C-C motif) receptor 4 // 3p24 // 1233
3869030	4.90158	0.683112	3.53479	0.307938	6.40521e-09	2.57896	2.57896	NM_033130 // SIGLEC10 // sialic acid binding Ig-like lectin 10 // 19q13.3 // 89790
3655986	7.19382	0.6876	5.83037	0.534647	1.11572e-07	2.573	2.573	XM_935827 // LOC442609 // similar to Williams Beuren syndrome chromosome region 19 // 7q22.1 // 442609 ///
3752258	6.7735	0.685795	5.41108	0.573105	1.77776e-07	2.57116	2.57116	NM_006495 // EVI2B // ecotropic viral integration site 2B // 17q11.2 // 2124
2388085	3.5588	0.757356	2.19758	0.405005	1.12424e-07	2.56902	2.56902	NM_003679 // KMO // kynurenine 3-monooxygenase (kynurenine 3-hydroxylase) // 1q42-q44 // 8564 ///
2902958	6.40455	0.529673	5.04383	0.666053	4.81836e-08	2.56813	2.56813	NM_007293 // C4A // complement component 4A (Rodgers blood group) // 6p21.3 // 720 ///
2362230	5.01849	0.579379	3.65983	0.393878	1.20847e-09	2.56447	2.56447	NM_030893 // CD1E // CD1e molecule // 1q22-q23 // 913 ///
3332276	4.43	0.623414	3.07294	0.374509	3.22753e-09	2.56162	2.56162	NM_000139 // MS4A2 // membrane-spanning 4-domains, subfamily A, member 2 (Fc fragment of IgE, high affinity I, receptor for; beta polypeptide) // 11q13 // 2206
3869062	4.27174	0.777503	2.9174	0.241375	5.26046e-08	2.55681	2.55681	NM_014442 // SIGLEC8 // sialic acid binding Ig-like lectin 8 // 19q13.33-q13.41 // 27181 ///
2790062	5.40421	0.701657	4.05005	0.285633	1.04798e-08	2.55648	2.55648	NM_152680 // TMEM154 // transmembrane protein 154 // 4q31.3 // 201799
2845362	5.78357	0.599422	4.43713	0.364428	1.67908e-09	2.54284	2.54284	NM_004174 // SLC9A3 // solute carrier family 9 (sodium/hydrogen exchanger), member 3 // 5p15.3 // 6550 ///
2599303	4.54164	0.561744	3.20032	0.371372	6.60054e-10	2.53382	2.53382	NR_002712 // IL8RBP // interleukin 8 receptor, beta pseudogene // 2q35 // 3580 ///
3894727	4.34021	0.898322	3.00009	0.314192	1.23918e-06	2.53172	2.53172	XM_938485 // LOC654056 // similar to Signal-regulatory protein beta-1 precursor (SIRP-beta-1) // // 654056 ///
3861948	7.45889	0.568218	6.12606	0.480079	6.04358e-09	2.51896	2.51896	NM_004877 // GMFG // glia maturation factor, gamma // 19q13.2 // 9535 ///
2427981	4.68963	0.703167	3.35726	0.172762	6.44142e-09	2.51815	2.51815	NM_020683 // ADORA3 // adenosine A3 receptor // 1p13.2 // 140 ///
2732508	2.94996	0.943658	1.62055	0.706836	3.14472e-05	2.513	2.513	NM_006419 // CXCL13 // chemokine (C-X-C motif) ligand 13 (B-cell chemoattractant) // 4q21 // 10563 ///
3960061	7.44114	0.547901	6.11464	0.506657	6.63086e-09	2.50794	2.50794	NM_002872 // RAC2 // ras-related C3 botulinum toxin substrate 2 (rho family, small GTP binding protein Rac2) // 22q13.1 // 5880 ///
2373842	6.88718	0.742636	5.56078	0.753156	5.08475e-06	2.50777	2.50777	NM_080922 // PTPRC // protein tyrosine phosphatase, receptor type, C // 1q31-q32 // 5788 ///
2351572	8.11981	0.573897	6.79373	0.594167	5.26652e-08	2.50721	2.50721	NM_000560 // CD53 // CD53 molecule // 1p13 // 963 ///
2363562	6.24253	0.71864	4.91741	0.551216	4.16541e-07	2.50554	2.50554	NM_173803 // MPV17L // MPV17 mitochondrial membrane protein-like // 16p13.11 // 255027 ///
3838385	7.05768	0.576631	5.73553	0.593368	5.81591e-08	2.50038	2.50038	NM_001774 // CD37 // CD37 molecule // 19q13.3 // 951 ///
2497119	3.89998	0.828758	2.58713	0.319976	5.00059e-07	2.48433	2.48433	NM_003855 // IL18R1 // interleukin 18 receptor 1 // 2q12 // 8809 ///
2997789	3.63825	0.768095	2.32594	0.379648	2.29178e-07	2.48339	2.48339	NM_181791 // GPR141 // G protein-coupled receptor 141 // 7p14.1 // 353345
3934729	6.96359	0.595577	5.65376	0.461415	1.26325e-08	2.47912	2.47912	NM_000211 // ITGB2 // integrin, beta 2 (complement component 3 receptor 3 and 4 subunit) // 21q22.3 // 3689 ///
3944543	5.22708	0.707279	3.92311	0.394231	7.97525e-08	2.46907	2.46907	NM_000631 // NCF4 // neutrophil cytosolic factor 4, 40kDa // 22q13.1 // 4689 ///
3770361	5.09002	0.787335	3.78619	0.20267	1.15047e-07	2.46883	2.46883	NM_139018 // CD300LF // CD300 molecule-like family member f // 17q25.1 // 146722 ///
3623655	5.25867	0.751307	3.95596	0.295372	9.05967e-08	2.46692	2.46692	NM_002112 // HDC // histidine decarboxylase // 15q21-q22 // 3067 ///
2584134	4.06108	0.797318	2.76159	0.393574	5.56356e-07	2.46142	2.46142	NM_002054 // GCG // glucagon // 2q36-q37 // 2641 ///
2353749	5.03906	0.778924	3.74028	0.273292	1.55699e-07	2.46021	2.46021	NM_004258 // IGSF2 // immunoglobulin superfamily, member 2 // 1p13 // 9398
3408505	4.79619	0.674865	3.50331	0.356229	2.89393e-08	2.45016	2.45016	XM_939662 // LOC650575 // hypothetical protein LOC650575 // // 650575 ///
2701071	4.72945	0.487011	3.43985	0.400654	2.87988e-10	2.4446	2.4446	NM_023914 // P2RY13 // purinergic receptor P2Y, G-protein coupled, 13 // 3q24 // 53829 ///
3339382	6.50975	0.70392	5.22578	0.475199	2.44895e-07	2.43509	2.43509	NM_000803 // FOLR2 // folate receptor 2 (fetal) // 11q13.3-q13.5 // 2350 ///
4011008	5.64364	0.951776	4.3602	0.507267	1.68447e-05	2.43419	2.43419	NM_007268 // VSIG4 // V-set and immunoglobulin domain containing 4 // Xq12-q13.3 // 11326
3870824	6.29007	0.615362	5.00938	0.482247	4.41107e-08	2.42954	2.42954	NM_002287 // LAIR1 // leukocyte-associated immunoglobulin-like receptor 1 // 19q13.4 // 3903 ///
3930525	4.80034	0.855403	3.52579	0.34409	1.64397e-06	2.41923	2.41923	AK024509 // C21orf96 // chromosome 21 open reading frame 96 // 21q22.12 // 80215
3475794	5.30005	1.02679	4.02696	0.505066	4.60346e-05	2.41678	2.41678	NM_006018 // GPR109B // G protein-coupled receptor 109B // 12q24.31 // 8843
3311832	5.26673	0.433327	3.999	0.347607	1.90253e-11	2.40782	2.40782	NM_003474 // ADAM12 // ADAM metallopeptidase domain 12 (meltrin alpha) // 10q26.3 // 8038 ///
3352948	6.89135	0.44221	5.62557	0.323045	1.50434e-11	2.40456	2.40456	NM_003105 // SORL1 // sortilin-related receptor, L(DLR class) A repeats-containing // 11q23.2-q24.2 // 6653 ///
2792166	5.67234	0.896082	4.40667	0.539276	1.23308e-05	2.4044	2.4044	NM_017923 // MARCH1 // membrane-associated ring finger (C3HC4) 1 // 4q32.3 // 55016 ///
3321361	5.73952	0.625033	4.47871	0.292555	6.06395e-09	2.3963	2.3963	NM_006108 // SPON1 // spondin 1, extracellular matrix protein // 11p15.2 // 10418 ///
3102372	6.54941	0.690205	5.29162	0.434118	1.73727e-07	2.39129	2.39129	NM_015170 // SULF1 // sulfatase 1 // 8q13.2-q13.3 // 23213 ///
3839910	3.85281	0.755007	2.59664	0.367654	3.62525e-07	2.38861	2.38861	NM_001462 // FPRL1 // formyl peptide receptor-like 1 // 19q13.3-q13.4 // 2358 ///
2829947	7.63609	0.746037	6.38096	0.370414	3.1247e-07	2.38689	2.38689	NM_000358 // TGFBI // transforming growth factor, beta-induced, 68kDa // 5q31 // 7045
3882265	4.94169	2.01358	3.68891	0.653379	0.0192775	2.383	2.383	NM_182519 // C20orf186 // chromosome 20 open reading frame 186 // 20q11.21 // 149954
2854327	5.64676	0.576209	4.39403	0.521941	5.48123e-08	2.38292	2.38292	NM_001465 // FYB // FYN binding protein (FYB-120/130) // 5p13.1 // 2533 ///
2440943	5.05022	0.687824	3.80436	0.494968	3.9814e-07	2.37161	2.37161	NM_000570 // FCGR3B // Fc fragment of IgG, low affinity IIIb, receptor (CD16b) // 1q23 // 2215 ///
3864551	6.11347	0.954307	4.87327	0.580026	4.33325e-05	2.36233	2.36233	NM_001005376 // PLAUR // plasminogen activator, urokinase receptor // 19q13 // 5329 ///
3944564	6.29302	0.531895	5.05339	0.343215	1.00487e-09	2.36136	2.36136	NM_000395 // CSF2RB // colony stimulating factor 2 receptor, beta, low-affinity (granulocyte-macrophage) // 22q13.1 // 1439 ///
2888485	5.12438	0.699944	3.88852	0.184817	3.19562e-08	2.35522	2.35522	NM_002115 // HK3 // hexokinase 3 (white cell) // 5q35.2 // 3101 ///
3849044	6.04404	0.546182	4.80986	0.360846	2.37356e-09	2.35247	2.35247	XM_942559 // LOC645769 // hypothetical LOC645769 // Xp22.2 // 645769 ///
2322848	4.62724	0.767767	3.39713	0.217162	2.44297e-07	2.34585	2.34585	NM_012387 // PADI4 // peptidyl arginine deiminase, type IV // 1p36.13 // 23569 ///
3938750	5.41403	0.791953	4.19132	0.720536	2.33133e-05	2.33385	2.33385	BC023973 // IGLV6-57 // immunoglobulin lambda variable 6-57 // 22q11.2 // 28778
3824874	7.79282	0.685171	6.57054	0.649572	3.14658e-06	2.33316	2.33316	NM_006332 // IFI30 // interferon, gamma-inducible protein 30 // 19p13.1 // 10437
3448744	5.71283	0.939624	4.4935	0.429183	2.0181e-05	2.32838	2.32838	NM_002820 // PTHLH // parathyroid hormone-like hormone // 12p12.1-p11.2 // 5744 ///
2760869	6.26287	0.861192	5.04523	0.583065	1.9159e-05	2.32566	2.32566	NM_005114 // HS3ST1 // heparan sulfate (glucosamine) 3-O-sulfotransferase 1 // 4p16 // 9957 ///
2520533	7.31346	0.58312	6.1065	0.470945	6.12112e-08	2.3085	2.3085	NM_001031716 // OBFC2A // oligonucleotide/oligosaccharide-binding fold containing 2A // 2q32.3 // 64859 ///
2902427	6.43582	0.596064	5.23265	0.30084	7.88036e-09	2.30245	2.30245	NM_205837 // LST1 // leukocyte specific transcript 1 // 6p21.3 // 7940 ///
3896034	6.26924	0.666143	5.06675	0.484535	4.51361e-07	2.30136	2.30136	NM_014737 // RASSF2 // Ras association (RalGDS/AF-6) domain family 2 // 20pter-p12.1 // 9770 ///
2758870	4.69096	0.652789	3.4915	0.308032	4.60348e-08	2.29654	2.29654	NM_018659 // CYTL1 // cytokine-like 1 // 4p16-p15 // 54360
3429669	4.63598	0.803371	3.43771	0.478587	5.00319e-06	2.29465	2.29465	---
3811574	5.37973	1.38843	4.18433	1.27364	0.0103504	2.29008	2.29008	NM_002974 // SERPINB4 // serpin peptidase inhibitor, clade B (ovalbumin), member 4 // 18q21.3 // 6318 ///
3512874	7.90951	0.55228	6.71505	0.498369	5.90866e-08	2.28859	2.28859	NM_002298 // LCP1 // lymphocyte cytosolic protein 1 (L-plastin) // 13q14.3 // 3936 ///
3850261	6.50493	0.540376	5.3118	0.374669	5.41755e-09	2.28649	2.28649	NM_002162 // ICAM3 // intercellular adhesion molecule 3 // 19p13.3-p13.2 // 3385 ///
4007617	7.6592	0.730561	6.46682	0.489817	1.81007e-06	2.2853	2.2853	NM_006875 // PIM2 // pim-2 oncogene // Xp11.23 // 11040
2624565	4.29463	0.753089	3.10371	0.360903	8.82868e-07	2.28299	2.28299	NM_018725 // IL17RB // interleukin 17 receptor B // 3p21.1 // 55540 ///
3791958	3.5845	1.1349	2.39556	0.449393	0.000269257	2.27985	2.27985	NM_005024 // SERPINB10 // serpin peptidase inhibitor, clade B (ovalbumin), member 10 // 18q21.3 // 5273
3239760	5.34225	0.503281	4.15626	0.397511	3.16225e-09	2.27521	2.27521	NM_019043 // APBB1IP // amyloid beta (A4) precursor protein-binding, family B, member 1 interacting protein // 10p12.1 // 54518 ///
3154185	6.3102	0.588132	5.12459	0.515687	1.91131e-07	2.2746	2.2746	NM_144649 // TMEM71 // transmembrane protein 71 // 8q24.22 // 137835 ///
3374934	6.18921	0.802917	5.00788	0.632064	2.12453e-05	2.26785	2.26785	NM_022349 // MS4A6A // membrane-spanning 4-domains, subfamily A, member 6A // 11q12.1 // 64231 ///
3549757	7.55608	1.34561	6.37628	1.17794	0.00800992	2.26545	2.26545	NM_001085 // SERPINA3 // serpin peptidase inhibitor, clade A (alpha-1 antiproteinase, antitrypsin), member 3 // 14q32.1 // 12 ///
2840036	6.21942	0.663758	5.0463	0.443711	4.23509e-07	2.255	2.255	NM_004946 // DOCK2 // dedicator of cytokinesis 2 // 5q35.1 // 1794 ///
3446919	4.90162	0.489867	3.73007	0.475446	1.36689e-08	2.25253	2.25253	NM_020298 // ABCC9 // ATP-binding cassette, sub-family C (CFTR/MRP), member 9 // 12p12.1 // 10060 ///
3653123	5.8556	0.572919	4.68468	0.444413	5.96391e-08	2.25156	2.25156	NM_002738 // PRKCB1 // protein kinase C, beta 1 // 16p11.2 // 5579 ///
3118818	6.64225	0.733414	5.47372	0.221868	2.9646e-07	2.24782	2.24782	NM_007079 // PTP4A3 // protein tyrosine phosphatase type IVA, member 3 // 8q24.3 // 11156 ///
3894668	4.53877	0.708577	3.37152	0.459428	1.31487e-06	2.24584	2.24584	NM_182483 // NSFL1C // NSFL1 (p97) cofactor (p47) // 20p13 // 55968 ///
3042610	5.15202	0.67498	3.98995	0.414915	4.62174e-07	2.23777	2.23777	NM_173803 // MPV17L // MPV17 mitochondrial membrane protein-like // 16p13.11 // 255027 ///
2428796	4.64777	0.788091	3.48607	0.60462	1.81535e-05	2.23721	2.23721	NM_001029944 // C1orf178 // chromosome 1 open reading frame 178 // 1p13.2 // 440603 ///
3402786	5.89189	0.716707	4.73227	0.439368	1.40884e-06	2.23399	2.23399	NM_000616 // CD4 // CD4 molecule // 12pter-p12 // 920 ///
3982560	4.16122	0.961223	3.00172	0.594774	0.00012408	2.2338	2.2338	NM_198333 // P2RY10 // purinergic receptor P2Y, G-protein coupled, 10 // Xq21.1 // 27334 ///
2970942	4.25413	0.548359	3.09494	0.266545	2.42095e-09	2.23333	2.23333	NM_000493 // COL10A1 // collagen, type X, alpha 1(Schmid metaphyseal chondrodysplasia) // 6q21-q22 // 1300
3426502	5.61797	0.525728	4.46361	0.267628	1.21166e-09	2.22586	2.22586	NM_005761 // PLXNC1 // plexin C1 // 12q23.3 // 10154 ///
3848492	5.00427	0.627157	3.85539	0.31194	5.85739e-08	2.21741	2.21741	NM_002002 // FCER2 // Fc fragment of IgE, low affinity II, receptor for (CD23) // 19p13.3 // 2208 ///
3372174	6.14755	0.56548	4.99897	0.42883	5.80741e-08	2.21696	2.21696	NM_003120 // SPI1 // spleen focus forming virus (SFFV) proviral integration oncogene spi1 // 11p11.2 // 6688
3153298	3.81384	0.609801	2.66772	0.572748	1.19007e-06	2.21318	2.21318	NM_031415 // MLZE // melanoma-derived leucine zipper, extra-nuclear factor // 8q24.1-q24.2 // 56169 ///
3454841	4.70363	0.568991	3.56615	0.415563	6.29405e-08	2.19996	2.19996	NM_152909 // ZNF548 // zinc finger protein 548 // 19q13.43 // 147694 ///
2816506	3.98351	0.713578	2.84785	0.213135	2.97633e-07	2.19719	2.19719	NM_130772 // S100Z // S100 calcium binding protein, zeta // 5q13.3 // 170591 ///
3015519	4.84029	0.623557	3.70801	0.430137	2.99889e-07	2.19206	2.19206	NM_013439 // PILRA // paired immunoglobin-like type 2 receptor alpha // 7q22.1 // 29992 ///
2362333	4.14086	0.540884	3.01187	0.303979	5.94295e-09	2.18707	2.18707	NM_002432 // MNDA // myeloid cell nuclear differentiation antigen // 1q22 // 4332 ///
3210013	4.21302	0.493492	3.08641	0.183658	1.68385e-10	2.18344	2.18344	NM_017662 // TRPM6 // transient receptor potential cation channel, subfamily M, member 6 // 9q21.13 // 140803 ///
3841574	3.95195	0.651805	2.82544	0.461674	8.66398e-07	2.1833	2.1833	NM_006847 // LILRB4 // leukocyte immunoglobulin-like receptor, subfamily B (with TM and ITIM domains), member 4 // 19q13.4 // 11006 ///
3791935	5.10365	1.49652	3.97797	0.994219	0.0122268	2.18205	2.18205	NM_002575 // SERPINB2 // serpin peptidase inhibitor, clade B (ovalbumin), member 2 // 18q21.3 // 5055
3632907	5.68421	0.483443	4.55923	0.286516	6.39098e-10	2.18098	2.18098	NM_003612 // SEMA7A // semaphorin 7A, GPI membrane anchor (John Milton Hagen blood group) // 15q22.3-q23 // 8482
3604147	4.51912	0.960745	3.39504	0.359774	6.15028e-05	2.17962	2.17962	NM_018689 // KIAA1199 // KIAA1199 // 15q24 // 57214
2773358	4.11833	1.40825	2.99564	0.523265	0.00376245	2.17753	2.17753	NM_002704 // PPBP // pro-platelet basic protein (chemokine (C-X-C motif) ligand 7) // 4q12-q13 // 5473
2598261	8.52694	0.79518	7.40553	0.399954	7.12392e-06	2.1756	2.1756	NM_002026 // FN1 // fibronectin 1 // 2q34 // 2335 ///
3957160	4.91079	0.744093	3.79058	0.542808	1.02812e-05	2.17378	2.17378	NM_002309 // LIF // leukemia inhibitory factor (cholinergic differentiation factor) // 22q12.2 // 3976
3222170	7.49059	0.583719	6.37153	0.413163	1.20718e-07	2.17207	2.17207	NM_002160 // TNC // tenascin C (hexabrachion) // 9q33 // 3371 ///
3049292	6.75017	0.594058	5.63301	0.501604	5.43221e-07	2.16919	2.16919	NM_001013398 // IGFBP3 // insulin-like growth factor binding protein 3 // 7p13-p12 // 3486 ///
3027204	5.51375	0.49773	4.39813	0.257748	8.04346e-10	2.16688	2.16688	NM_030984 // TBXAS1 // thromboxane A synthase 1 (platelet, cytochrome P450, family 5, subfamily A) // 7q34-q35 // 6916 ///
3708858	7.27605	0.716489	6.1628	0.509223	5.48283e-06	2.16332	2.16332	NM_001040059 // CD68 // CD68 molecule // 17p13 // 968 ///
4044363	4.37731	0.679887	3.27133	0.231127	2.37983e-07	2.15246	2.15246	NM_001841 // CNR2 // cannabinoid receptor 2 (macrophage) // 1p36.11 // 1269
2362746	5.06449	0.770432	3.96183	0.460616	9.81274e-06	2.14749	2.14749	NM_020125 // SLAMF8 // SLAM family member 8 // 1q23.2 // 56833
2992576	4.15112	1.35512	3.04982	1.02387	0.00941842	2.14549	2.14549	NM_000600 // IL6 // interleukin 6 (interferon, beta 2) // 7p21 // 3569 ///
3944129	5.07253	0.881321	3.972	0.407075	3.61404e-05	2.14433	2.14433	NM_002133 // HMOX1 // heme oxygenase (decycling) 1 // 22q12|22q13.1 // 3162 ///
3948047	5.90454	0.602061	4.8124	0.387075	2.11665e-07	2.13191	2.13191	NM_022141 // PARVG // parvin, gamma // 22q13.2-q13 // 64098 ///
2324884	5.92528	0.66699	4.83988	0.44057	1.77611e-06	2.12197	2.12197	NM_000491 // C1QB // complement component 1, q subcomponent, B chain // 1p36.12 // 713 ///
2363808	6.07929	0.662943	4.99561	0.359554	7.24571e-07	2.11944	2.11944	NM_001002273 // FCGR2B // Fc fragment of IgG, low affinity IIb, receptor (CD32) // 1q23 // 2213 ///
3577612	5.97677	0.603174	4.89579	0.39053	2.76825e-07	2.11548	2.11548	NM_000295 // SERPINA1 // serpin peptidase inhibitor, clade A (alpha-1 antiproteinase, antitrypsin), member 1 // 14q32.1 // 5265 ///
3010503	4.7254	0.758345	3.64595	0.46209	1.14496e-05	2.11323	2.11323	NM_001001548 // CD36 // CD36 molecule (thrombospondin receptor) // 7q11.2 // 948 ///
3457275	4.92621	0.76186	3.85121	0.483896	1.53062e-05	2.10671	2.10671	XM_942033 // LOC652543 // similar to Matrix metalloproteinase-19 precursor (MMP-19) (Matrix metalloproteinase RASI) (MMP-18) // // 652543 ///
3654175	6.3798	0.383157	5.30673	0.369091	3.42321e-10	2.1039	2.1039	NM_000418 // IL4R // interleukin 4 receptor // 16p11.2-12.1 // 3566
2638789	4.79386	0.70079	3.72143	0.611223	2.06988e-05	2.10297	2.10297	NM_175862 // CD86 // CD86 molecule // 3q21 // 942 ///
3839920	5.35534	0.754123	4.2846	0.698256	8.29873e-05	2.10051	2.10051	NM_002030 // FPRL2 // formyl peptide receptor-like 2 // 19q13.3-q13.4 // 2359
2547454	3.31003	0.488799	2.23948	0.209465	6.85389e-10	2.10023	2.10023	NM_021209 // CARD12 // caspase recruitment domain family, member 12 // 2p22-p21 // 58484 ///
2724671	5.86074	0.525606	4.79206	0.556092	7.67653e-07	2.09752	2.09752	NM_004310 // RHOH // ras homolog gene family, member H // 4p13 // 399 ///
2439286	2.00543	0.552373	0.936961	0.524238	7.68778e-07	2.09721	2.09721	NM_001764 // CD1B // CD1b molecule // 1q22-q23 // 910
2920327	4.24475	0.539537	3.1777	0.38592	6.88324e-08	2.09514	2.09514	NM_003269 // NR2E1 // nuclear receptor subfamily 2, group E, member 1 // 6q21 // 7101 ///
3340449	5.94272	0.637412	4.87815	0.359069	5.63255e-07	2.09154	2.09154	NM_007256 // SLCO2B1 // solute carrier organic anion transporter family, member 2B1 // 11q13 // 11309 ///
2680046	6.37468	0.925529	5.31499	0.628461	0.000313953	2.0845	2.0845	NM_182920 // ADAMTS9 // ADAM metallopeptidase with thrombospondin type 1 motif, 9 // 3p14.3-p14.2 // 56999 ///
3159330	6.26017	0.586704	5.20282	0.50883	1.40956e-06	2.08111	2.08111	XR_001516 // FKSG49 // FKSG49 // 13q14.3 // 400949 ///
3270270	5.62601	0.569236	4.56878	0.214525	1.9815e-08	2.08093	2.08093	NM_130435 // PTPRE // protein tyrosine phosphatase, receptor type, E // 10q26 // 5791 ///
3957188	4.11235	1.16503	3.0604	0.377576	0.00108837	2.07334	2.07334	NM_020530 // OSM // oncostatin M // 22q12.2 // 5008
3702547	7.1317	0.667642	6.08071	0.493106	5.37027e-06	2.07195	2.07195	NM_021149 // COTL1 // coactosin-like 1 (Dictyostelium) // 16q24.1 // 23406 ///
2610707	3.95655	0.725571	2.90572	0.253283	2.07359e-06	2.07171	2.07171	NM_000861 // HRH1 // histamine receptor H1 // 3p25 // 3269
3564210	6.9468	0.722558	5.89735	0.368941	4.61696e-06	2.06974	2.06974	NM_002863 // PYGL // phosphorylase, glycogen; liver (Hers disease, glycogen storage disease type VI) // 14q21-q22 // 5836 ///
3444043	3.80991	1.36203	2.76277	0.405174	0.00432623	2.06644	2.06644	NM_002543 // OLR1 // oxidised low density lipoprotein (lectin-like) receptor 1 // 12p13.2-p12.3 // 4973
3465248	7.66151	0.754768	6.61509	0.849737	0.000343288	2.06539	2.06539	NM_002345 // LUM // lumican // 12q21.3-q22 // 4060
2406783	5.16079	0.551199	4.12076	0.210723	1.46018e-08	2.05626	2.05626	NM_156038 // CSF3R // colony stimulating factor 3 receptor (granulocyte) // 1p35-p34.3 // 1441 ///
3661718	6.21715	0.700915	5.17732	0.401959	4.75499e-06	2.05598	2.05598	NM_017839 // AYTL1 // acyltransferase like 1 // 16q12.2 // 54947 ///
3707095	6.72895	0.602235	5.69056	0.316621	2.37891e-07	2.05394	2.05394	NM_004313 // ARRB2 // arrestin, beta 2 // 17p13 // 409 ///
4011844	6.41924	0.56292	5.38085	0.579659	3.3548e-06	2.05393	2.05393	NM_001025265 // LOC158830 // similar to Ab2-183 // Xq13.1 // 158830 ///
2620842	5.90601	1.14919	4.86967	0.576867	0.00184353	2.05101	2.05101	NM_000648 // CCR2 // chemokine (C-C motif) receptor 2 // 3p21.31 // 1231 ///
3429676	4.36869	0.595213	3.33246	0.488488	1.79755e-06	2.05086	2.05086	---
3734379	5.92061	0.58377	4.8845	0.372052	3.08256e-07	2.05069	2.05069	NM_007261 // CD300A // CD300a molecule // 17q25.1 // 11314
2539387	3.79206	0.760747	2.75647	0.225994	4.72337e-06	2.04996	2.04996	NM_207358 // LOC339789 // hypothetical protein LOC339789 // 2p25.1 // 339789 ///
3127199	5.20169	0.594929	4.16715	0.267475	1.21102e-07	2.04846	2.04846	NM_003974 // DOK2 // docking protein 2, 56kDa // 8p21.3 // 9046
3762198	8.49276	0.926077	7.46141	0.46767	0.000197582	2.04395	2.04395	NM_000088 // COL1A1 // collagen, type I, alpha 1 // 17q21.33 // 1277
3603295	6.09733	0.712545	5.06896	0.475863	1.32711e-05	2.03971	2.03971	NM_004378 // CRABP1 // cellular retinoic acid binding protein 1 // 15q24 // 1381 ///
2359664	5.27463	0.816533	4.24832	1.07464	0.00224171	2.03681	2.03681	NM_002965 // S100A9 // S100 calcium binding protein A9 (calgranulin B) // 1q21 // 6280 ///
2390102	2.56161	0.497719	1.53648	0.239076	4.17572e-09	2.03514	2.03514	NM_145278 // C1orf150 // chromosome 1 open reading frame 150 // 1q44 // 148823 ///
2378068	4.80392	1.18992	3.77964	0.473658	0.00207468	2.03394	2.03394	NM_015714 // G0S2 // G0/G1switch 2 // 1q32.2-q41 // 50486
2403215	6.08324	0.427064	5.06108	0.261088	3.88076e-10	2.03096	2.03096	NM_005248 // FGR // Gardner-Rasheed feline sarcoma viral (v-fgr) oncogene homolog // 1p36.2-p36.1 // 2268 ///
3230440	4.79375	1.47146	3.77631	0.227896	0.00792447	2.02433	2.02433	NM_203347 // UNQ2541 // MSFL2541 // 9q34.3 // 389812
3422855	7.99012	0.525824	6.97287	0.693953	1.30684e-05	2.02406	2.02406	NM_006851 // GLIPR1 // GLI pathogenesis-related 1 (glioma) // 12q21.2 // 11010 ///
3887210	5.06575	0.533864	4.04855	0.260865	2.42739e-08	2.02399	2.02399	NM_004994 // MMP9 // matrix metallopeptidase 9 (gelatinase B, 92kDa gelatinase, 92kDa type IV collagenase) // 20q11.2-q13.1 // 4318
3763270	5.98192	0.593232	4.96544	0.597515	9.39108e-06	2.02298	2.02298	NM_012329 // MMD // monocyte to macrophage differentiation-associated // 17q // 23531
2370926	4.75564	0.668836	3.7404	0.378918	3.11071e-06	2.02124	2.02124	NM_030769 // NPL // N-acetylneuraminate pyruvate lyase (dihydrodipicolinate synthase) // 1q25 // 80896 ///
3001479	6.1472	0.527557	5.1353	0.449803	4.02364e-07	2.01656	2.01656	NM_006060 // IKZF1 // IKAROS family zinc finger 1 (Ikaros) // 7p13-p11.1 // 10320 ///
2868044	3.25847	0.685762	2.24911	0.23481	1.51807e-06	2.01301	2.01301	NM_000439 // PCSK1 // proprotein convertase subtilisin/kexin type 1 // 5q15-q21 // 5122 ///
3031624	6.88397	0.570141	5.87811	0.510757	2.5456e-06	2.00814	2.00814	NM_018487 // HCA112 // hepatocellular carcinoma-associated antigen 112 // 7q36.1 // 55365
2905404	6.52439	0.677886	5.51879	0.464211	9.66106e-06	2.00778	2.00778	NM_001001852 // PIM3 // pim-3 oncogene // 22q13 // 415116 ///
2806468	6.48681	0.666442	5.48198	1.03552	0.00108508	2.00671	2.00671	NM_002185 // IL7R // interleukin 7 receptor // 5p13 // 3575
2979246	2.37318	1.2401	1.36956	1.12347	0.0149257	2.00503	2.00503	NM_130900 // RAET1L // retinoic acid early transcript 1L // 6q25.1 // 154064
2378121	5.13855	0.672409	4.13761	0.354006	3.37107e-06	2.0013	2.0013	NM_025228 // TRAF3IP3 // TRAF3 interacting protein 3 // 1q32.3-q41 // 80342 ///
2319802	8.01555	0.628763	7.01473	0.517017	8.05616e-06	2.00114	2.00114	NM_002631 // PGD // phosphogluconate dehydrogenase // 1p36.3-p36.13 // 5226 ///
2348992	6.46052	0.703059	5.45993	0.752828	0.000186774	2.00081	2.00081	NM_001078 // VCAM1 // vascular cell adhesion molecule 1 // 1p32-p31 // 7412 ///
3864646	4.89754	0.398788	5.89884	0.557112	2.64779e-07	0.499548	-2.00181	NM_002250 // KCNN4 // potassium intermediate/small conductance calcium-activated channel, subfamily N, member 4 // 19q13.2 // 3783 ///
2918982	2.484	0.523324	3.48592	0.492197	8.63545e-07	0.499335	-2.00266	NM_175768 // GRIK2 // glutamate receptor, ionotropic, kainate 2 // 6q16.3-q21 // 2898 ///
3163982	4.44061	0.531743	5.44263	0.478269	8.21907e-07	0.499299	-2.00281	NM_139264 // ADAMTSL1 // ADAMTS-like 1 // 9p22.2-p22.1 // 92949 ///
3919834	3.53211	0.409841	4.53635	0.523324	1.4916e-07	0.498534	-2.00588	XM_945121 // LOC644783 // hypothetical protein LOC644783 // 21q22.12 // 644783 ///
2957402	2.03579	0.563204	3.04083	0.853365	0.000135133	0.498257	-2.007	XM_930196 // LOC647169 // similar to Glutathione S-transferase A3-3 (GST class-alpha) // 6p12.1 // 647169 ///
3540155	3.19562	0.791031	4.20278	0.590485	0.000121933	0.497526	-2.00995	NM_172365 // C14orf50 // chromosome 14 open reading frame 50 // 14q23.3 // 145376
3447798	2.92571	1.19933	3.93307	1.29282	0.0191192	0.497455	-2.01023	NM_018272 // CASC1 // cancer susceptibility candidate 1 // 12p12.1 // 55259 ///
3459120	5.55482	0.57388	6.56219	0.373387	4.2016e-07	0.497452	-2.01024	NM_153377 // LRIG3 // leucine-rich repeats and immunoglobulin-like domains 3 // 12q14.1 // 121227 ///
3802602	3.05115	0.647527	4.06705	0.576604	1.61238e-05	0.49452	-2.02216	NM_001792 // CDH2 // cadherin 2, type 1, N-cadherin (neuronal) // 18q11.2 // 1000 ///
3061964	3.31229	0.470095	4.3283	0.522867	3.92974e-07	0.494483	-2.02232	NM_000940 // PON3 // paraoxonase 3 // 7q21.3 // 5446 ///
3446728	2.51073	0.876275	3.5279	0.69922	0.000476284	0.494087	-2.02394	NM_021094 // SLCO1A2 // solute carrier organic anion transporter family, member 1A2 // 12p12 // 6579 ///
2692883	2.86494	0.982345	3.88394	0.932483	0.00278073	0.493459	-2.02651	NM_033049 // MUC13 // mucin 13, cell surface associated // // 56667
3875908	4.65142	0.602461	5.67115	0.556001	6.19643e-06	0.493212	-2.02753	NM_182797 // PLCB4 // phospholipase C, beta 4 // 20p12 // 5332 ///
3654699	6.02173	0.501179	7.04752	0.35026	2.93892e-08	0.491143	-2.03607	NM_012385 // NUPR1 // nuclear protein 1 // 16p11.2 // 26471 ///
3322251	6.49228	0.595937	7.51952	0.614161	1.01109e-05	0.49065	-2.03811	XM_938444 // FLJ43489 // hypothetical protein LOC644283 // 7q11.21 // 644283 ///
3819743	2.91085	1.23975	3.94242	0.954641	0.00834912	0.489176	-2.04425	---
3110999	5.43732	0.409821	6.46927	0.545159	1.40078e-07	0.489048	-2.04479	XM_294450 // LOC346887 // similar to solute carrier family 16 (monocarboxylic acid transporters), member 14 // 8q23.1 // 346887 ///
3280573	6.35608	0.752843	7.39186	0.616336	6.66096e-05	0.487753	-2.05022	NM_213569 // NEBL // nebulette // 10p12 // 10529 ///
3189714	4.13132	0.307878	5.16876	0.307707	4.81664e-12	0.487191	-2.05258	NM_032293 // GARNL3 // GTPase activating Rap/RanGAP domain-like 3 // 9q33.3 // 84253 ///
3119200	4.97324	0.687505	6.01118	0.978246	0.000592501	0.487023	-2.05329	NM_005672 // PSCA // prostate stem cell antigen // 8q24.2 // 8000 ///
3010439	3.96224	0.529079	5.00054	0.519455	7.75409e-07	0.486901	-2.05381	NM_002069 // GNAI1 // guanine nucleotide binding protein (G protein), alpha inhibiting activity polypeptide 1 // 7q21 // 2770
3786868	3.63762	0.678163	4.67637	1.14169	0.00158777	0.486748	-2.05445	NM_015865 // SLC14A1 // solute carrier family 14 (urea transporter), member 1 (Kidd blood group) // 18q11-q12 // 6563 ///
3110789	3.12048	0.358215	4.16296	0.312184	4.76399e-11	0.485493	-2.05976	NM_012082 // ZFPM2 // zinc finger protein, multitype 2 // 8q23 // 23414 ///
2709235	3.85129	0.290415	4.89458	0.449272	4.80944e-10	0.48522	-2.06092	NM_001346 // DGKG // diacylglycerol kinase, gamma 90kDa // 3q27-q28 // 1608 ///
3715614	5.11969	0.683547	6.16398	0.82557	0.000168988	0.484881	-2.06236	NM_003984 // SLC13A2 // solute carrier family 13 (sodium-dependent dicarboxylate transporter), member 2 // 17p13.2 // 9058 ///
3046444	6.16213	1.18674	7.20724	0.651636	0.00265218	0.484608	-2.06352	NM_003014 // SFRP4 // secreted frizzled-related protein 4 // 7p14.1 // 6424 ///
2598828	6.78643	0.610172	7.83678	0.51723	2.67981e-06	0.482853	-2.07102	NM_000599 // IGFBP5 // insulin-like growth factor binding protein 5 // 2q33-q36 // 3488
2777044	3.60873	1.2033	4.66172	1.36267	0.0174024	0.481966	-2.07483	NM_178135 // HSD17B13 // hydroxysteroid (17-beta) dehydrogenase 13 // 4q22.1 // 345275
2514216	4.15761	0.703793	5.21169	0.591806	2.31472e-05	0.481606	-2.07639	NM_001039724 // NOSTRIN // nitric oxide synthase trafficker // 2q24.3 // 115677 ///
2692319	4.44111	0.257222	5.4994	0.382945	8.52191e-12	0.480204	-2.08245	NM_183357 // ADCY5 // adenylate cyclase 5 // 3q13.2-q21 // 111 ///
3065546	4.37306	1.461	5.43147	1.37334	0.0303595	0.48016	-2.08264	NM_182634 // FLJ36166 // hypothetical protein FLJ36166 // 7q22.1 // 349152 ///
3148463	3.56333	0.482907	4.62221	0.774289	1.29432e-05	0.480005	-2.08331	NM_001146 // ANGPT1 // angiopoietin 1 // 8q22.3-q23 // 284 ///
2441329	3.69511	1.12876	4.75478	1.15163	0.00786406	0.479742	-2.08445	NM_178550 // C1orf110 // chromosome 1 open reading frame 110 // 1q23.3 // 339512 ///
3113352	4.94618	0.514794	6.01948	0.521295	3.27101e-07	0.47523	-2.10424	NM_021110 // COL14A1 // collagen, type XIV, alpha 1 (undulin) // 8q23 // 7373 ///
2723605	3.48144	0.74713	4.55601	0.42796	7.80792e-06	0.474811	-2.1061	NM_018302 // C4orf19 // chromosome 4 open reading frame 19 // 4p14 // 55286 ///
3142381	2.28469	0.72992	3.36153	1.02975	0.000714905	0.474064	-2.10942	NM_001442 // FABP4 // fatty acid binding protein 4, adipocyte // 8q21 // 2167 ///
3185498	5.87489	0.408017	6.95197	0.668157	7.33482e-07	0.473988	-2.10976	NM_001860 // SLC31A2 // solute carrier family 31 (copper transporters), member 2 // 9q31-q32 // 1318 ///
2582124	6.19859	1.34917	7.28066	0.992746	0.0097314	0.472348	-2.11708	NM_173172 // NR4A2 // nuclear receptor subfamily 4, group A, member 2 // 2q22-q23 // 4929 ///
3424218	4.81619	0.618945	5.89906	0.41909	5.46565e-07	0.472089	-2.11824	NM_024560 // FLJ21963 // FLJ21963 protein // 12q21.31 // 79611 ///
3142362	1.60171	0.371723	2.68704	0.388873	3.12452e-10	0.471284	-2.12186	NM_002677 // PMP2 // peripheral myelin protein 2 // 8q21.3-q22.1 // 5375 ///
3628498	4.75008	0.752761	5.83691	0.653125	4.63604e-05	0.470795	-2.12406	NM_206925 // CA12 // carbonic anhydrase XII // 15q22 // 771 ///
2486178	5.67217	0.962822	6.76005	0.539501	0.000211382	0.470451	-2.12562	NM_002398 // MEIS1 // Meis1, myeloid ecotropic viral integration site 1 homolog (mouse) // 2p14-p13 // 4211 ///
3059667	3.99096	1.05442	5.08194	0.726438	0.000980578	0.469443	-2.13018	NM_152754 // SEMA3D // sema domain, immunoglobulin domain (Ig), short basic domain, secreted, (semaphorin) 3D // 7q21.11 // 223117 ///
3104013	3.55032	0.432282	4.64293	0.331641	4.92528e-10	0.468911	-2.1326	NM_024721 // ZFHX4 // zinc finger homeodomain 4 // 8q21.11 // 79776 ///
3059942	3.67451	0.408942	4.76712	0.370457	5.66889e-10	0.468912	-2.1326	NM_152748 // KIAA1324L // KIAA1324-like // 7q21.12 // 222223 ///
2597347	2.42237	0.386604	3.51733	0.459072	2.91196e-09	0.468149	-2.13607	NM_001608 // ACADL // acyl-Coenzyme A dehydrogenase, long chain // 2q34-q35 // 33
3355956	5.1295	0.677017	6.22658	0.645937	1.52791e-05	0.467462	-2.13921	NM_003658 // BARX2 // BarH-like homeobox 2 // 11q25 // 8538 ///
2688813	4.86304	0.421096	5.96496	0.373064	7.5032e-10	0.465898	-2.14639	NM_199512 // CCDC80 // coiled-coil domain containing 80 // 3q13.2 // 151887 ///
3326461	6.76035	0.803498	7.86661	0.547212	2.89918e-05	0.464497	-2.15287	NM_012153 // EHF // ets homologous factor // 11p12 // 26298 ///
2350489	6.68691	0.927929	7.7988	0.758683	0.000367634	0.462689	-2.16128	NM_020775 // KIAA1324 // KIAA1324 // 1p13.3 // 57535 ///
3802416	4.73566	0.995069	5.84832	0.668721	0.000398046	0.462438	-2.16245	NM_031422 // CHST9 // carbohydrate (N-acetylgalactosamine 4-0) sulfotransferase 9 // 18q11.2 // 83539 ///
3278057	6.58237	0.582933	7.69591	0.587544	1.553e-06	0.462157	-2.16377	NM_031455 // CCDC3 // coiled-coil domain containing 3 // 10p13 // 83643 ///
2337716	4.99176	0.661306	6.10648	0.477694	1.50293e-06	0.461781	-2.16553	NM_006252 // PRKAA2 // protein kinase, AMP-activated, alpha 2 catalytic subunit // 1p31 // 5563
2905296	4.61545	0.372512	5.73565	0.499258	3.6023e-09	0.460033	-2.17376	NM_153370 // PI16 // peptidase inhibitor 16 // 6p21.2 // 221476 ///
2431031	3.90554	0.755681	5.03119	0.99327	0.000402955	0.458296	-2.18199	NM_005518 // HMGCS2 // 3-hydroxy-3-methylglutaryl-Coenzyme A synthase 2 (mitochondrial) // 1p13-p12 // 3158
3039791	6.6002	1.16266	7.72606	0.778935	0.00172625	0.458231	-2.1823	NM_006408 // AGR2 // anterior gradient 2 homolog (Xenopus laevis) // 7p21.3 // 10551 ///
2320120	0.8842	0.433693	2.01147	0.700713	8.21035e-07	0.457782	-2.18444	---
3248470	3.48445	1.28511	4.62278	1.22142	0.00945007	0.454287	-2.20125	NM_173554 // C10orf107 // chromosome 10 open reading frame 107 // 10q21.2 // 219621
3289948	1.63539	0.487302	2.7785	0.663663	7.05438e-07	0.452782	-2.20857	NM_033056 // PCDH15 // protocadherin 15 // 10p11.2-q21 // 65217 ///
3740616	3.09653	0.960111	4.24383	0.646146	0.000183273	0.451471	-2.21498	---
2730396	3.89567	0.981266	5.04596	1.38814	0.00573309	0.450535	-2.21958	NM_012390 // SMR3A // submaxillary gland androgen regulated protein 3 homolog A (mouse) // 4q13.3 // 26952
3622386	5.52673	0.574447	6.67721	0.500997	2.08335e-07	0.450475	-2.21988	NM_001482 // GATM // glycine amidinotransferase (L-arginine:glycine amidinotransferase) // 15q21.1 // 2628
2730303	5.1823	1.24925	6.33511	0.849835	0.00276193	0.449751	-2.22345	NM_152997 // C4orf7 // chromosome 4 open reading frame 7 // 4q13|4q13 // 260436 ///
2672140	7.49771	1.36056	8.65147	0.781412	0.00394562	0.449453	-2.22492	NM_002343 // LTF // lactotransferrin // 3q21-q23 // 4057 ///
2849056	4.22751	1.30217	5.38146	1.30509	0.0110492	0.449393	-2.22522	NM_207507 // FAM74A4 // family with sequence similarity 74, member A4 // 9q12 // 401508 ///
3407453	4.07206	0.459466	5.22858	0.54948	4.1136e-08	0.448594	-2.22919	NM_000921 // PDE3A // phosphodiesterase 3A, cGMP-inhibited // 12p12 // 5139
3113280	6.26877	0.577369	7.43662	0.601732	7.39495e-07	0.445086	-2.24676	NM_022783 // DEPDC6 // DEP domain containing 6 // 8q24.12 // 64798 ///
3921992	4.3747	0.723212	5.54372	0.430003	1.2623e-06	0.444725	-2.24858	NM_206964 // FAM3B // family with sequence similarity 3, member B // 21q22.3 // 54097 ///
3414315	6.44994	0.674943	7.62315	0.678468	7.3761e-06	0.443431	-2.25514	NM_001651 // AQP5 // aquaporin 5 // 12q13 // 362 ///
3296046	4.62892	0.663205	5.80534	0.385092	2.03662e-07	0.442447	-2.26016	NM_001014797 // KCNMA1 // potassium large conductance calcium-activated channel, subfamily M, alpha member 1 // 10q22.3 // 3778 ///
2914693	5.39971	0.624571	6.57667	0.352073	5.35855e-08	0.442282	-2.261	NM_031469 // SH3BGRL2 // SH3 domain binding glutamic acid-rich protein like 2 // 6q13-15 // 83699
2761842	5.95766	1.33179	7.13524	0.59928	0.00188128	0.442093	-2.26197	NM_006017 // PROM1 // prominin 1 // 4p15.32 // 8842
3144934	5.80137	0.826765	6.98285	0.67821	3.98867e-05	0.440898	-2.2681	NM_005261 // GEM // GTP binding protein overexpressed in skeletal muscle // 8q13-q21 // 2669 ///
2420229	2.8256	0.346427	4.00735	0.501594	5.88678e-10	0.440815	-2.26852	NM_024686 // TTLL7 // tubulin tyrosine ligase-like family, member 7 // 1p31.1 // 79739 ///
3444906	5.24484	0.654481	6.43453	0.665765	3.89523e-06	0.438395	-2.28105	NM_018050 // MANSC1 // MANSC domain containing 1 // 12p13.2 // 54682
3415229	6.61511	1.25292	7.80652	0.914729	0.00255039	0.437877	-2.28375	NM_173158 // NR4A1 // nuclear receptor subfamily 4, group A, member 1 // 12q13 // 3164 ///
2794584	4.1469	0.641004	5.34331	0.514255	4.42189e-07	0.436361	-2.29168	NM_201592 // GPM6A // glycoprotein M6A // 4q34 // 2823 ///
3768880	2.74043	0.415149	3.9397	0.683838	1.43299e-07	0.435494	-2.29624	NM_080282 // ABCA10 // ATP-binding cassette, sub-family A (ABC1), member 10 // 17q24 // 10349 ///
2735759	5.3197	0.880776	6.51998	0.787978	0.000117762	0.435189	-2.29785	NM_007351 // MMRN1 // multimerin 1 // 4q22 // 22915
2600881	5.02938	0.567175	6.23439	0.390191	1.20229e-08	0.433766	-2.30539	NM_181461 // PAX3 // paired box gene 3 (Waardenburg syndrome 1) // 2q35-q37|2q35 // 5077 ///
2912416	4.14373	0.795047	5.34919	0.561948	7.91011e-06	0.433632	-2.3061	NM_001704 // BAI3 // brain-specific angiogenesis inhibitor 3 // 6q12 // 577 ///
3450775	4.72013	0.741033	5.92974	0.731931	1.72446e-05	0.432383	-2.31277	NM_017641 // KIF21A // kinesin family member 21A // 12q12 // 55605 ///
3694215	2.75186	0.795488	3.97016	0.677159	1.77962e-05	0.429788	-2.32673	NM_001796 // CDH8 // cadherin 8, type 2 // 16q22.1 // 1006 ///
3021158	5.44211	0.403533	6.66253	0.404412	8.02231e-11	0.429156	-2.33016	NM_024913 // FLJ21986 // hypothetical protein FLJ21986 // 7q31.31 // 79974 ///
3451814	4.08955	0.663434	5.3148	0.745414	6.66498e-06	0.427723	-2.33796	NM_006159 // NELL2 // NEL-like 2 (chicken) // 12q13.11-q13.12 // 4753 ///
3256192	6.00232	0.328914	7.23317	0.331167	3.08796e-13	0.426066	-2.34706	XM_937044 // LOC643150 // similar to Ribosome biogenesis protein BMS1 homolog // 10q23.2 // 643150 ///
2686602	3.04495	0.623227	4.28852	0.543611	2.24013e-07	0.422327	-2.36783	NM_016247 // IMPG2 // interphotoreceptor matrix proteoglycan 2 // 3q12.2-q12.3 // 50939
2896848	3.03287	0.473701	4.28049	0.474011	2.16729e-09	0.421143	-2.37449	NM_153020 // RBM24 // RNA binding motif protein 24 // 6p22.3 // 221662 ///
2958670	4.29052	0.447688	5.54155	0.499403	1.86416e-09	0.420147	-2.38012	NM_183227 // RAB23 // RAB23, member RAS oncogene family // 6p11 // 51715 ///
2344888	6.74721	0.782791	7.99829	0.716832	1.44709e-05	0.420133	-2.3802	NM_001554 // CYR61 // cysteine-rich, angiogenic inducer, 61 // 1p31-p22 // 3491 ///
3555736	6.8867	0.625022	8.1385	0.449228	5.48137e-08	0.419923	-2.38139	NM_201541 // NDRG2 // NDRG family member 2 // 14q11.2 // 57447 ///
2476510	5.77402	0.635984	7.02722	0.485192	1.11446e-07	0.419516	-2.3837	NM_000627 // LTBP1 // latent transforming growth factor beta binding protein 1 // 2p22-p21 // 4052 ///
4015397	6.21118	0.792668	7.48227	0.749131	1.6827e-05	0.414347	-2.41343	NM_003270 // TSPAN6 // tetraspanin 6 // Xq22 // 7105 ///
3214800	3.15922	1.08965	4.43677	0.828552	0.000354586	0.412495	-2.42427	NM_033014 // OGN // osteoglycin (osteoinductive factor, mimecan) // 9q22 // 4969 ///
2343231	3.01493	0.545519	4.30053	0.686624	2.70665e-07	0.4102	-2.43783	NM_144573 // NEXN // nexilin (F actin binding protein) // 1p31.1 // 91624 ///
2834503	3.26334	0.945969	4.5551	0.953827	0.000217913	0.408453	-2.44826	NM_006846 // SPINK5 // serine peptidase inhibitor, Kazal type 5 // 5q32 // 11005 ///
2450865	7.44491	0.38974	8.76057	0.45035	2.95031e-11	0.401742	-2.48916	NM_004078 // CSRP1 // cysteine and glycine-rich protein 1 // 1q32 // 1465 ///
2827525	6.83429	0.567839	8.15173	0.587771	4.83301e-08	0.401246	-2.49224	NM_024089 // KDELC1 // KDEL (Lys-Asp-Glu-Leu) containing 1 // 13q33 // 79070 ///
2750198	2.19211	0.459892	3.51345	0.484899	5.03443e-10	0.400163	-2.49898	NM_006174 // NPY5R // neuropeptide Y receptor Y5 // 4q31-q32 // 4889 ///
3811949	1.65326	0.295996	2.97475	0.406564	2.37231e-13	0.400121	-2.49925	NM_021153 // CDH19 // cadherin 19, type 2 // 18q22-q23 // 28513 ///
2597552	3.62272	0.540377	4.94579	0.423846	1.24301e-09	0.399683	-2.50199	NM_001030 // RPS27 // ribosomal protein S27 (metallopanstimulin 1) // 1q21 // 6232 ///
2725061	4.34975	0.369484	5.67325	0.273566	3.74557e-14	0.399563	-2.50273	NM_014988 // DKFZP686A01247 // hypothetical protein // 4p13 // 22998 ///
2958172	3.7069	1.00252	5.03109	0.56327	2.67675e-05	0.399373	-2.50393	NM_021073 // BMP5 // bone morphogenetic protein 5 // 6p12.1 // 653
2676454	5.14124	0.468181	6.46846	0.600438	7.51195e-09	0.398537	-2.50918	NM_205853 // MUSTN1 // musculoskeletal, embryonic nuclear protein 1 // 3p21.1 // 389125
3147173	4.78682	0.55359	6.11538	0.331485	3.23306e-10	0.398165	-2.51152	NM_001040624 // NCALD // neurocalcin delta // 8q22.2 // 83988 ///
3783565	3.33878	0.642225	4.66855	0.679788	5.52004e-07	0.397832	-2.51362	NM_000371 // TTR // transthyretin (prealbumin, amyloidosis type I) // 18q12.1 // 7276
2351687	3.43332	0.555186	4.76857	0.514909	7.8878e-09	0.396321	-2.5232	NM_001025199 // CHI3L2 // chitinase 3-like 2 // 1p13.3 // 1117 ///
2956536	2.62165	0.299746	3.97254	0.606918	2.22732e-10	0.392052	-2.55069	NM_003296 // CRISP2 // cysteine-rich secretory protein 2 // 6p21-qter // 7180 ///
2730404	2.72567	0.63347	4.08772	1.09194	3.6479e-05	0.389028	-2.57051	NM_006685 // SMR3B // submaxillary gland androgen regulated protein 3 homolog B (mouse) // 4q13.3 // 10879 ///
3324447	2.54586	0.774642	3.92074	0.741993	3.69204e-06	0.385585	-2.59346	NM_203371 // LOC387758 // similar to RIKEN cDNA 1110018M03 // 11p14.2 // 387758
3461981	3.9791	1.36991	5.37623	1.00287	0.00135072	0.379684	-2.63377	NM_004616 // TSPAN8 // tetraspanin 8 // 12q14.1-q21.1 // 7103 ///
3986261	2.61891	0.577494	4.01753	0.409219	7.50912e-10	0.379291	-2.6365	NM_194463 // RNF128 // ring finger protein 128 // Xq22.3 // 79589 ///
2511045	2.75524	0.701065	4.154	0.636864	3.06491e-07	0.379254	-2.63676	NM_052917 // GALNT13 // UDP-N-acetyl-alpha-D-galactosamine:polypeptide N-acetylgalactosaminyltransferase 13 (GalNAc-T13) // 2q23.3-q24.1 // 114805 ///
2995765	3.47143	0.744507	4.88373	0.770606	2.17515e-06	0.375713	-2.66161	NM_194300 // CCDC129 // coiled-coil domain containing 129 // 7p15.1 // 223075 ///
3300115	5.1738	0.659304	6.60594	0.467163	8.9432e-09	0.37058	-2.69847	NM_005398 // PPP1R3C // protein phosphatase 1, regulatory (inhibitor) subunit 3C // 10q23-q24 // 5507
3391149	5.00971	0.512433	6.4445	0.517218	5.69497e-10	0.3699	-2.70343	NM_001885 // CRYAB // crystallin, alpha B // 11q22.3-q23.1 // 1410 ///
4000538	2.70177	0.593184	4.13911	0.62082	2.17436e-08	0.369248	-2.70821	NM_004469 // FIGF // c-fos induced growth factor (vascular endothelial growth factor D) // Xp22.31 // 2277
3421511	9.85033	0.811388	11.3075	0.348531	5.55987e-08	0.364215	-2.74563	NM_000239 // LYZ // lysozyme (renal amyloidosis) // 12q15 // 4069 ///
3585272	3.07928	0.349098	4.54539	0.472062	9.80361e-13	0.361957	-2.76276	NM_033223 // GABRG3 // gamma-aminobutyric acid (GABA) A receptor, gamma 3 // 15q12 // 2567 ///
3417703	2.21464	0.293737	3.68777	0.729193	8.89541e-10	0.3602	-2.77624	NM_003725 // HSD17B6 // hydroxysteroid (17-beta) dehydrogenase 6 // 12q13 // 8630
3984445	2.07988	0.330835	3.56155	0.614287	5.08633e-11	0.358072	-2.79273	NM_022144 // TNMD // tenomodulin // Xq21.33-q23 // 64102 ///
2643217	4.74865	1.02148	6.24221	1.07569	0.000120427	0.355134	-2.81584	NM_001063 // TF // transferrin // 3q22.1 // 7018 ///
2451043	4.62896	0.588004	6.1272	0.498706	9.43522e-10	0.353985	-2.82498	XM_930278 // LOC647235 // hypothetical protein LOC647235 // 2p14 // 647235 ///
2429556	3.50975	0.490775	5.00906	0.562732	3.18613e-10	0.353724	-2.82707	NM_001232 // CASQ2 // calsequestrin 2 (cardiac muscle) // 1p13.3-p11 // 845
2773972	2.69128	1.00382	4.19991	1.69131	0.0019043	0.351447	-2.84538	NM_005409 // CXCL11 // chemokine (C-X-C motif) ligand 11 // 4q21.2 // 6373 ///
2796951	4.28854	0.582141	5.80383	0.581594	2.78841e-09	0.349826	-2.85856	NM_014476 // PDLIM3 // PDZ and LIM domain 3 // 4q35 // 27295 ///
4018080	4.2039	0.478834	5.72743	0.483767	2.44186e-11	0.347833	-2.87494	NM_145234 // CHRDL1 // chordin-like 1 // Xq22.3 // 91851 ///
3128817	2.80709	0.300771	4.33325	0.471943	7.27249e-14	0.347201	-2.88018	NM_033304 // ADRA1A // adrenergic, alpha-1A-, receptor // 8p21-p11.2 // 148 ///
3443226	2.78586	0.631642	4.31322	0.478054	1.25958e-09	0.34691	-2.88259	NM_003480 // MFAP5 // microfibrillar associated protein 5 // 12p13.1-p12.3 // 8076
3299504	8.74403	0.643594	10.2776	0.472246	1.40871e-09	0.345418	-2.89504	NM_001613 // ACTA2 // actin, alpha 2, smooth muscle, aorta // 10q23.3 // 59 ///
3595315	4.23539	0.47633	5.78055	0.407412	2.33717e-12	0.342658	-2.91836	NM_032866 // CGNL1 // cingulin-like 1 // 15q21.3 // 84952 ///
3768627	3.89627	0.629224	5.47347	0.53477	1.40863e-09	0.335131	-2.98391	NM_007168 // ABCA8 // ATP-binding cassette, sub-family A (ABC1), member 8 // 17q24 // 10351 ///
2728938	3.24479	0.719805	4.82386	0.522288	8.43017e-09	0.334697	-2.98777	XM_937110 // LOC653950 // similar to Latrophilin-3 precursor (Calcium-independent alpha-latrotoxin receptor 3) (Lectomedin-3) // // 653950 ///
2739308	2.96037	0.579062	4.54003	0.719257	1.16596e-08	0.33456	-2.989	NM_001963 // EGF // epidermal growth factor (beta-urogastrone) // 4q25 // 1950
2366941	5.98613	0.949019	7.56694	0.646954	1.37398e-06	0.334295	-2.99137	NM_006894 // FMO3 // flavin containing monooxygenase 3 // 1q23-q25 // 2328 ///
3302886	2.88671	0.352957	4.47144	0.416047	1.66517e-14	0.333387	-2.99951	NM_021828 // HPSE2 // heparanase 2 // 10q23-q24 // 60495 ///
3519840	4.26895	0.730322	5.85758	0.71449	1.05544e-07	0.332487	-3.00763	NM_032229 // SLITRK6 // SLIT and NTRK-like family, member 6 // 13q31.1 // 84189
2928461	4.65686	0.745998	6.2513	0.528038	1.2639e-08	0.331151	-3.01977	NM_001032394 // GPR126 // G protein-coupled receptor 126 // 6q24.1 // 57211 ///
3513752	4.20587	0.560379	5.82247	0.4854	5.59543e-11	0.326102	-3.06652	XM_926967 // OK/SW-CL.92 // OK/SW-CL.92 // 12q24.31 // 643662 ///
3943234	4.32742	0.952575	5.94951	0.832807	3.92334e-06	0.324865	-3.0782	NM_000343 // SLC5A1 // solute carrier family 5 (sodium/glucose cotransporter), member 1 // 22q13.1|22q12.3 // 6523
3133233	5.79924	0.655098	7.42211	0.596502	3.43823e-09	0.324689	-3.07987	XM_943043 // LOC653904 // similar to hypothetical protein FLJ14346 // // 653904 ///
3710823	3.02887	0.504884	4.65198	0.665827	6.13257e-10	0.324634	-3.08039	NM_153604 // MYOCD // myocardin // 17p11.2 // 93649 ///
2768197	3.68161	0.482148	5.31005	0.776499	3.79313e-09	0.323438	-3.09178	NM_152995 // NFXL1 // nuclear transcription factor, X-box binding-like 1 // 4p12 // 152518 ///
2957342	3.72077	1.18668	5.35188	0.984899	7.21308e-05	0.32284	-3.09751	NM_145740 // GSTA1 // glutathione S-transferase A1 // 6p12.1 // 2938 ///
2730281	5.21086	1.64868	6.84576	0.896127	0.0008456	0.321993	-3.10565	NM_017855 // ODAM // odontogenic, ameloblast asssociated // 4q13.3 // 54959 ///
3667890	4.31319	0.829687	5.9504	0.712016	2.45888e-07	0.321477	-3.11065	NM_020995 // HPR // haptoglobin-related protein // 16q22.1 // 3250
3933559	4.60037	0.961012	6.24872	1.24353	6.27372e-05	0.319005	-3.13475	NM_003225 // TFF1 // trefoil factor 1 (breast cancer, estrogen-inducible sequence expressed in) // 21q22.3 // 7031
3301263	4.46682	0.566217	6.11538	0.539952	1.19004e-10	0.318957	-3.13521	NM_015385 // SORBS1 // sorbin and SH3 domain containing 1 // 10q23.3-q24.1 // 10580 ///
4004044	3.93096	0.606762	5.59418	0.520751	1.82221e-10	0.315733	-3.16723	NM_004012 // DMD // dystrophin (muscular dystrophy, Duchenne and Becker types) // Xp21.2 // 1756 ///
2678468	5.96434	1.00361	7.63974	0.610575	7.79159e-07	0.313081	-3.19406	NM_138805 // FAM3D // family with sequence similarity 3, member D // 3p14.2 // 131177
2783596	3.69001	0.504464	5.36633	0.568406	3.15011e-11	0.31288	-3.19612	NM_033430 // PDE5A // phosphodiesterase 5A, cGMP-specific // 4q25-q27 // 8654 ///
3424785	2.83586	0.596288	4.53352	0.496167	5.32312e-11	0.308287	-3.24373	NM_006982 // CART1 // cartilage paired-class homeoprotein 1 // 12q21.3-q22 // 8092
3374517	3.07063	1.0733	4.77604	0.956021	1.33171e-05	0.306634	-3.26122	NM_145016 // GLYATL2 // glycine-N-acyltransferase-like 2 // 11q12.1 // 219970 ///
2445982	2.56607	0.46612	4.2873	0.73092	3.08771e-10	0.30329	-3.29717	NM_004673 // ANGPTL1 // angiopoietin-like 1 // 1q25.2 // 9068
3105600	4.48289	0.624543	6.20826	0.825785	1.93997e-08	0.302421	-3.30665	NM_000067 // CA2 // carbonic anhydrase II // 8q22 // 760 ///
2934521	3.67231	0.499098	5.43612	0.421469	1.97004e-13	0.294471	-3.39592	NM_021977 // SLC22A3 // solute carrier family 22 (extraneuronal monoamine transporter), member 3 // 6q26-q27 // 6581
2811145	2.97255	0.631154	4.74262	0.80947	9.51643e-09	0.293195	-3.4107	AK094518 // PART1 // prostate androgen-regulated transcript 1 // 5q12.1 // 25859 ///
3985717	4.60612	0.420721	6.42727	0.413643	3.56491e-15	0.282995	-3.53363	XM_942893 // LOC644234 // hypothetical protein LOC644234 // Xq22.2 // 644234 ///
3374890	7.3938	1.67692	9.25279	0.640033	0.000128224	0.27567	-3.62753	NM_001062 // TCN1 // transcobalamin I (vitamin B12 binding protein, R binder family) // 11q11-q12 // 6947
3992408	5.69636	0.586735	7.56793	0.609968	3.22523e-11	0.273277	-3.6593	NM_001449 // FHL1 // four and a half LIM domains 1 // Xq26 // 2273 ///
3821263	4.31052	0.68909	6.18537	0.559826	1.32883e-10	0.272655	-3.66764	NM_001299 // CNN1 // calponin 1, basic, smooth muscle // 19p13.2-p13.1 // 1264
2792127	3.7092	0.644071	5.5946	0.560812	4.07167e-11	0.27067	-3.69453	NM_000909 // NPY1R // neuropeptide Y receptor Y1 // 4q31.3-q32 // 4886 ///
2528476	4.688	0.451167	6.61705	0.548328	1.07683e-13	0.262602	-3.80804	NM_001927 // DES // desmin // 2q35 // 1674 ///
2855542	4.54777	1.13679	6.52947	0.638304	2.47905e-07	0.253191	-3.94958	NM_148672 // CCL28 // chemokine (C-C motif) ligand 28 // 5p12 // 56477 ///
3882190	4.94095	1.35298	6.9835	1.45514	9.09769e-05	0.242735	-4.11972	NM_025227 // BPIL1 // bactericidal/permeability-increasing protein-like 1 // 20q11.21 // 80341
2585476	2.08566	0.463646	4.14514	0.702466	1.50832e-12	0.239903	-4.16835	NM_002976 // SCN7A // sodium channel, voltage-gated, type VII, alpha // 2q21-q23 // 6332 ///
3256221	3.89327	0.990719	5.9879	0.796149	3.81029e-08	0.234129	-4.27115	XM_927212 // LOC642826 // hypothetical protein LOC642826 // 10q11.22 // 642826 ///
4037778	7.89485	2.19345	9.99441	0.628133	0.000540631	0.23333	-4.28578	NM_004406 // DMBT1 // deleted in malignant brain tumors 1 // 10q25.3-q26.1 // 1755 ///
3667858	3.64406	1.05369	5.86893	0.907091	6.5927e-08	0.213919	-4.67468	NM_005143 // HP // haptoglobin // 16q22.1 // 3240 ///
3645359	7.2237	1.4317	9.49675	0.555295	4.84342e-07	0.206893	-4.83343	NM_145252 // LOC124220 // similar to common salivary protein 1 // 16p13.3 // 124220
3617719	2.28473	0.296731	4.62126	1.368	1.00591e-08	0.197987	-5.05084	NM_005159 // ACTC1 // actin, alpha, cardiac muscle 1 // 15q11-q14 // 70 ///
3210616	1.86996	0.597529	4.20746	0.755779	2.29729e-12	0.197853	-5.05427	NM_138818 // C9orf65 // chromosome 9 open reading frame 65 // 9q21.13 // 158471
3246407	7.78025	1.51935	10.1395	1.0139	4.12401e-06	0.194893	-5.13102	NM_138634 // MSMB // microseminoprotein, beta- // 10q11.2 // 4477 ///
3444336	4.79032	0.727522	7.32227	1.1392	1.23192e-09	0.172905	-5.78352	NM_007244 // PRR4 // proline rich 4 (lacrimal) // 12p13 // 11272
3682028	5.16425	0.781892	7.82882	0.775662	3.26446e-12	0.157719	-6.34037	NM_002474 // MYH11 // myosin, heavy polypeptide 11, smooth muscle // 16p13.11 // 4629 ///
2957314	2.66467	1.26393	5.39727	2.2043	3.80019e-05	0.150455	-6.6465	XM_930194 // LOC647168 // similar to Glutathione S-transferase A1 (GTH1) (HA subunit 1) (GST-epsilon) (GSTA1-1) (GST class-alpha) // 6p12.1 // 647168 ///
3063589	6.77281	1.71319	9.51011	0.779323	6.31303e-07	0.149965	-6.66823	NM_001185 // AZGP1 // alpha-2-glycoprotein 1, zinc // 7q22.1 // 563 ///
2923270	3.30042	0.896167	6.10608	0.981209	9.77318e-11	0.143025	-6.99181	NM_002667 // PLN // phospholamban // 6q22.1 // 5350 ///
2730173	7.70537	2.27283	10.579	0.416996	1.08416e-05	0.136448	-7.32881	NM_003154 // STATH // statherin // 4q11-q13 // 6779 ///
2489007	4.86724	1.0836	7.75195	0.810756	1.14269e-10	0.135399	-7.38558	NM_001615 // ACTG2 // actin, gamma 2, smooth muscle, enteric // 2p13.1 // 72 ///
3728637	5.0365	1.35042	7.98252	0.918846	6.2851e-09	0.129766	-7.7062	NM_006151 // LPO // lactoperoxidase // 17q23.1 // 4025
2730431	4.54408	1.46863	7.9017	1.43506	3.78526e-08	0.0975563	-10.2505	NM_152291 // MUC7 // mucin 7, secreted // 4q13-q21 // 4589
3028934	6.20072	1.9427	10.2824	0.730246	1.25797e-09	0.0590612	-16.9316	NM_002652 // PIP // prolactin-induced protein // 7q34 // 5304 ///
3444578	2.80241	1.61987	6.93193	3.01437	6.46471e-06	0.0571334	-17.5029	NM_002723 // PRB4 // proline-rich protein BstNI subfamily 4 // 12p13.2 // 5545 ///
2925013	5.0665	2.02919	9.28961	0.793222	1.73216e-09	0.053545	-18.6759	NM_001010905 // C6orf58 // chromosome 6 open reading frame 58 // 6q22.33 // 352999
2956563	4.17959	1.54895	8.99496	0.924346	3.85036e-13	0.0355165	-28.156	NM_006061 // CRISP3 // cysteine-rich secretory protein 3 // 6p12.3 // 10321 ///
